# Supplementary material for: Hybrid gene misregulation in multiple developing tissues within a recent adaptive radiation of Cyprinodon pupfishes
Source: PubMed Central journal article supplement (PMC6619667; doi:10.1371/journal.pone.0218899), 2019-07-10
Supplement: pone.0218899.s007.pdf [file pone.0218899.s007.pdf]

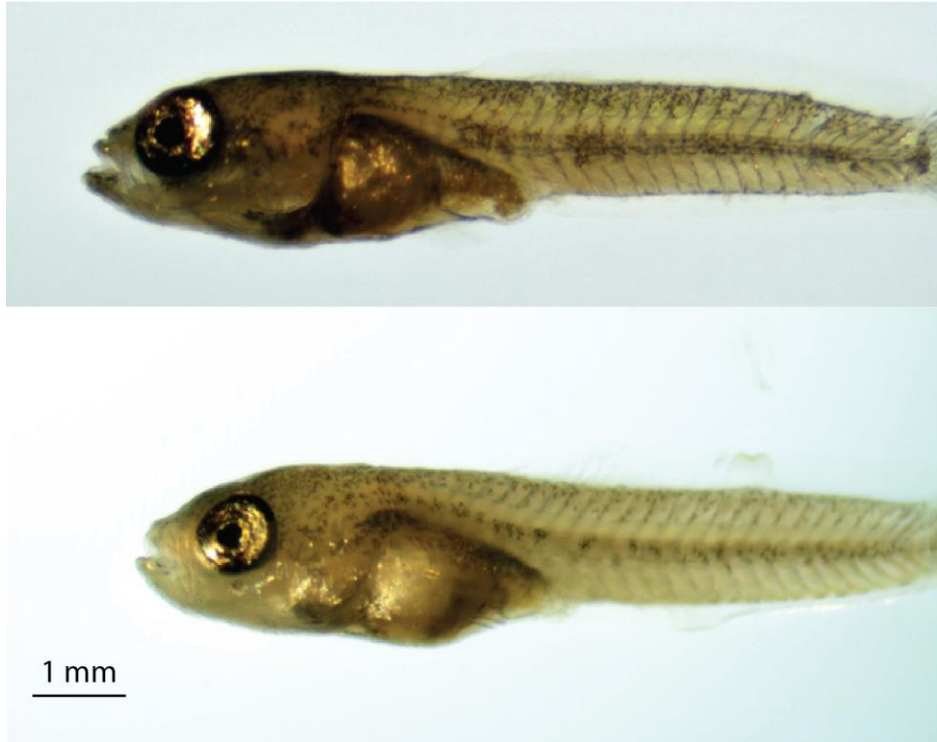

**Fig S1.** 20 day old generalist (top) and molluscivore (bottom).
