# Supplementary material for: Hybrid gene misregulation in multiple developing tissues within a recent adaptive radiation of Cyprinodon pupfishes
Source: PubMed Central journal article supplement (PMC6619667; doi:10.1371/journal.pone.0218899), 2019-07-10
Supplement: pone.0218899.s008.pdf [file pone.0218899.s008.pdf]

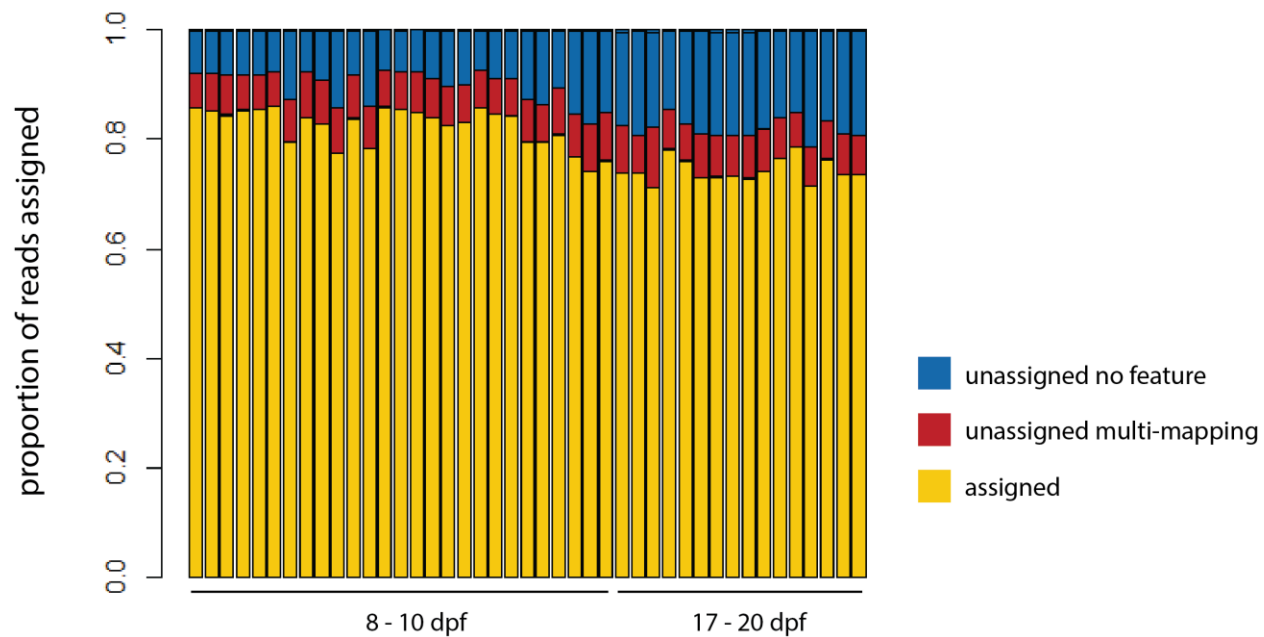

**Figure S2.** Proportion of reads assigned to features (yellow), unassigned due to multi-mapping (red), and unassigned due to no match to annotated features (blue) using STAR aligner.
