# Supplementary material for: Hybrid gene misregulation in multiple developing tissues within a recent adaptive radiation of Cyprinodon pupfishes
Source: PubMed Central journal article supplement (PMC6619667; doi:10.1371/journal.pone.0218899), 2019-07-10
Supplement: pone.0218899.s010.pdf [file pone.0218899.s010.pdf]

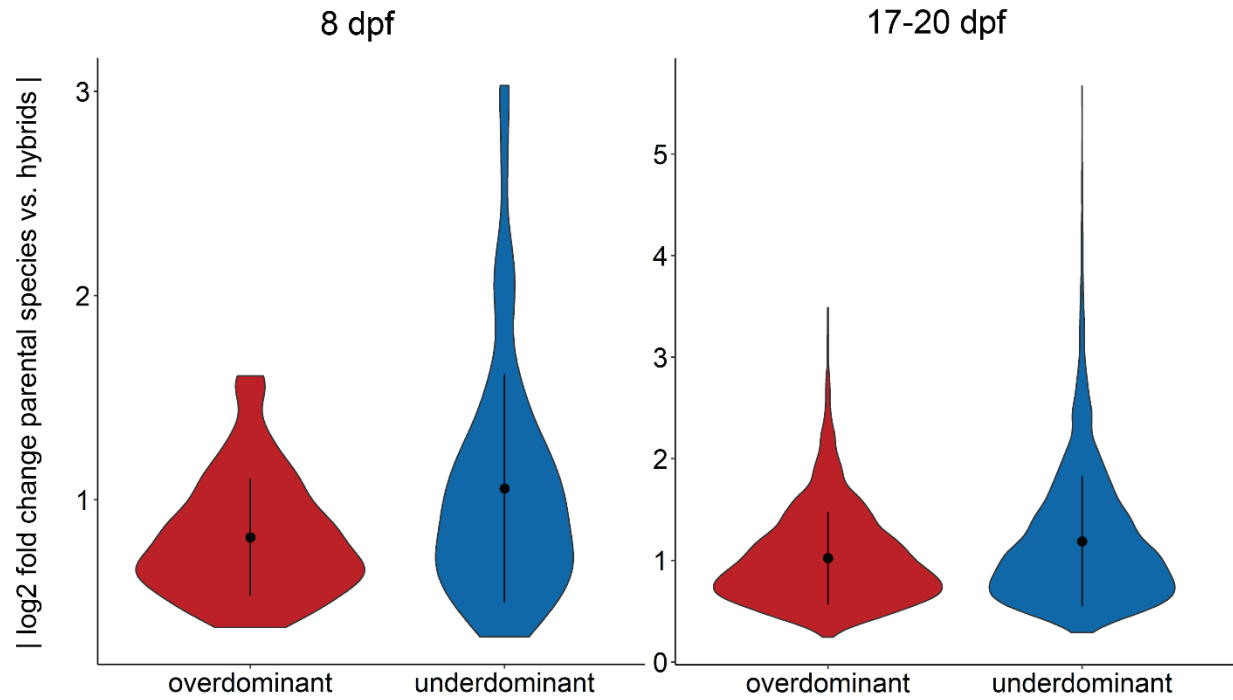

**Fig S4.** Genes showing underdominant expression in hybrids show a higher magnitude of misregulation than genes showing overdominance (Wilcoxon rank sum test; 8 dpf  $P = 8.5 \times 10^{-5}$  17-20 dpf  $P < 2.2 \times 10^{-16}$ ).
